# Supplementary material for: Simultaneous Production of a Virus-Like Particle Linked to dsRNA to Enhance dsRNA Delivery for Yellow Head Virus Inhibition
Source: MDPI journal article supplement (doi:10.3390/v14122594), 2022-11-22
Supplement: s1 [file s1]

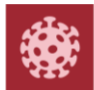

Supplementary Materials

|                       |        |                                                                                    |      |
|-----------------------|--------|------------------------------------------------------------------------------------|------|
| cpPstDNV Sinnuengnong | (1)    | 1                                                                                  | 80   |
| cpPstDNV-dspro        | (1)    | ATGGGCAGCAGCCATCATCATCATCACAGCAGCGGCTGGTGCCGCGCGGCAGCCATATGTGCGCCGATTCAACAAG       |      |
| FJ848675 YHV protease | (1)    | ATGGGCAGCAGCCATCATCATCATCACAGCAGCGGCTGGTGCCGCGCGGCAGCCATATGTGCGCCGATTCAACAAG       |      |
| YHV anti protease     | (1)    | -----                                                                              |      |
| cpPstDNV Sinnuengnong | (81)   | 81                                                                                 | 160  |
| cpPstDNV-dspro        | (81)   | AGCAAGCCCAAGGAAAAGATCCAGGAGGGATGCACATAATGAAGACGAAGAACACGCCGAAGGATCAAGTGGACCAGACC   |      |
| FJ848675 YHV protease | (1)    | AGCAAGCCCAAGGAAAAGATCCAGGAGGGATGCACATAATGAAGACGAAGAACACGCCGAAGGATCAAGTGGACCAGACC   |      |
| YHV anti protease     | (1)    | -----                                                                              |      |
| cpPstDNV Sinnuengnong | (161)  | 161                                                                                | 240  |
| cpPstDNV-dspro        | (161)  | CACACAGATGTCTACAATTCAATACTGGAGACTCAATATATATTACTTTCCAAACAAGAAGATACTTCGAATTCGACGCT   |      |
| FJ848675 YHV protease | (1)    | CACACAGATGTCTACAATTCAATACTGGAGACTCAATATATATTACTTTCCAAACAAGAAGATACTTCGAATTCGACGCT   |      |
| YHV anti protease     | (1)    | -----                                                                              |      |
| cpPstDNV Sinnuengnong | (241)  | 241                                                                                | 320  |
| cpPstDNV-dspro        | (241)  | GCCAATGATGGAACTTCGACGGAAAAATTTATACTGCCTCCCACTACATTGGATGAACCTTATCTCTATGGCTTAAA      |      |
| FJ848675 YHV protease | (1)    | GCCAATGATGGAACTTCGACGGAAAAATTTATACTGCCTCCCACTACATTGGATGAACCTTATCTCTATGGCTTAAA      |      |
| YHV anti protease     | (1)    | -----                                                                              |      |
| cpPstDNV Sinnuengnong | (321)  | 321                                                                                | 400  |
| cpPstDNV-dspro        | (321)  | GAGCAGCGACAGTTTCAGCAACAGAAACACAACGATATAAGATGGTAAATCAATGATGAAGACCTACGGATGGAAAGTAC   |      |
| FJ848675 YHV protease | (1)    | GAGCAGCGACAGTTTCAGCAACAGAAACACAACGATATAAGATGGTAAATCAATGATGAAGACCTACGGATGGAAAGTAC   |      |
| YHV anti protease     | (1)    | -----                                                                              |      |
| cpPstDNV Sinnuengnong | (401)  | 401                                                                                | 480  |
| cpPstDNV-dspro        | (401)  | ATAAAGCAGGCGTAGTGATGCATCGATGGTACCCTTATGAAAGACTTAAAGTATCAGGAGGCACATCATTTGAGACT      |      |
| FJ848675 YHV protease | (1)    | ATAAAGCAGGCGTAGTGATGCATCGATGGTACCCTTATGAAAGACTTAAAGTATCAGGAGGCACATCATTTGAGACT      |      |
| YHV anti protease     | (1)    | -----                                                                              |      |
| cpPstDNV Sinnuengnong | (481)  | 481                                                                                | 560  |
| cpPstDNV-dspro        | (481)  | CTCACATTTACAGACCCCCATATTTAGAAATATTTAAGGATACTACTGGACTACATAATCAACTATCAACTAAGGAAGC    |      |
| FJ848675 YHV protease | (1)    | CTCACATTTACAGACCCCCATATTTAGAAATATTTAAGGATACTACTGGACTACATAATCAACTATCAACTAAGGAAGC    |      |
| YHV anti protease     | (1)    | -----                                                                              |      |
| cpPstDNV Sinnuengnong | (561)  | 561                                                                                | 640  |
| cpPstDNV-dspro        | (561)  | CGACGTAACATTGGCAAAATGGATACAAAATCCCCAACTTGTGACCGTACAATCAACAGCAGCAAACTATGAAGACCCAA   |      |
| FJ848675 YHV protease | (1)    | CGACGTAACATTGGCAAAATGGATACAAAATCCCCAACTTGTGACCGTACAATCAACAGCAGCAAACTATGAAGACCCAA   |      |
| YHV anti protease     | (1)    | -----                                                                              |      |
| cpPstDNV Sinnuengnong | (641)  | 641                                                                                | 720  |
| cpPstDNV-dspro        | (641)  | TCCAACAATTTGGATTTCATGGAACAAATGCGAACCAGGTGACAGAAAAGCCTATACAATCCATGGTGACACTAGAAATTGG |      |
| FJ848675 YHV protease | (1)    | TCCAACAATTTGGATTTCATGGAACAAATGCGAACCAGGTGACAGAAAAGCCTATACAATCCATGGTGACACTAGAAATTGG |      |
| YHV anti protease     | (1)    | -----                                                                              |      |
| cpPstDNV Sinnuengnong | (721)  | 721                                                                                | 800  |
| cpPstDNV-dspro        | (721)  | TATGGCGGAGAAATACCAACAACCGGACCCACCTTCATCCCAAAATGGGGTGGTCAATTAATAATGGGACAAACCATCCCT  |      |
| FJ848675 YHV protease | (1)    | TATGGCGGAGAAATACCAACAACCGGACCCACCTTCATCCCAAAATGGGGTGGTCAATTAATAATGGGACAAACCATCCCT  |      |
| YHV anti protease     | (1)    | -----                                                                              |      |
| cpPstDNV Sinnuengnong | (801)  | 801                                                                                | 880  |
| cpPstDNV-dspro        | (801)  | TGGAAACCTAGTCTACCCAGCAGACCACCATACAAACGACTGGCAACAGATCTTCATGAGAATGTCACCAATCAAAGGAC   |      |
| FJ848675 YHV protease | (1)    | TGGAAACCTAGTCTACCCAGCAGACCACCATACAAACGACTGGCAACAGATCTTCATGAGAATGTCACCAATCAAAGGAC   |      |
| YHV anti protease     | (1)    | -----                                                                              |      |
| cpPstDNV Sinnuengnong | (881)  | 881                                                                                | 960  |
| cpPstDNV-dspro        | (881)  | CAAATGGAGACGAACCTAAACTTGGCTGCAGAGTACAAGCCGACTTCTTCTACATCTAGAAGTACGACTCCCACCACAA    |      |
| FJ848675 YHV protease | (1)    | CAAATGGAGACGAACCTAAACTTGGCTGCAGAGTACAAGCCGACTTCTTCTACATCTAGAAGTACGACTCCCACCACAA    |      |
| YHV anti protease     | (1)    | -----                                                                              |      |
| cpPstDNV Sinnuengnong | (961)  | 961                                                                                | 1040 |
| cpPstDNV-dspro        | (961)  | GGATGTGTCGCAAGTTTGGGGATGTTACAATATCTTCACGCACCATGTACTGGACAACCTTAACAAATGTTATATTATGCA  |      |
| FJ848675 YHV protease | (1)    | GGATGTGTCGCAAGTTTGGGGATGTTACAATATCTTCACGCACCATGTACTGGACAACCTTAACAAATGTTATATTATGCA  |      |
| YHV anti protease     | (1)    | -----                                                                              |      |
| cpPstDNV Sinnuengnong | (1041) | 1041                                                                               | 1120 |
| cpPstDNV-dspro        | (1041) | TACTAACTAA-----XhoI                                                                |      |
| FJ848675 YHV protease | (1)    | TACTAACTAACTCGAGTCAGCGGCAAAATTCCTCTACTTTCCTCGTCACATCTTCGACTCCTGTACTGACAACACTCT     |      |
| YHV anti protease     | (1)    | -----CTCGAGTCAGCGGCAAAATTCCTCTACTTTCCTCGTCACATCTTCGACTCCTGTACTGACAACACTCT          |      |
| cpPstDNV Sinnuengnong | (990)  | 1121                                                                               | 1200 |
| cpPstDNV-dspro        | (1121) | CACACGACACATCCGCGTCACAAAAGGTGAAGAACTCATGACATCGAATTGTTGAGCGAAGAATATGACGCCACTCCTT    |      |
| FJ848675 YHV protease | (68)   | CACACGACACATCCGCGTCACAAAAGGTGAAGAACTCATGACATCGAATTGTTGAGCGAAGAATATGACGCCACTCCTT    |      |
| YHV anti protease     | (1)    | -----                                                                              |      |

|                       |        |                                                                                   |      |       |
|-----------------------|--------|-----------------------------------------------------------------------------------|------|-------|
|                       |        | 1201                                                                              |      | 1280  |
| cpPstDNV Sinnuengnong | (990)  | -----                                                                             |      | ----- |
| cpPstDNV-dspro        | (1201) | TCATCAAACCGACAGTCCATTTCGCAGAAGCAACTGTACTCAAATTCGGTAAACTCCAACGCACTCAGTACGCATACTTC  |      |       |
| FJ848675 YHV protease | (148)  | TCATCAAACCGACAGTCCATTTCGCAGAAGCAACTGTACTCAAATTCGGTAAACTCCAACGCACTCAGTACGCATACTTC  |      |       |
| YHV anti protease     | (1)    | -----                                                                             |      | ----- |
|                       |        | 1281                                                                              |      | 1360  |
| cpPstDNV Sinnuengnong | (990)  | -----                                                                             |      | ----- |
| cpPstDNV-dspro        | (1281) | GTCACGTGCTGATGACATCAGGGTTGGTTCAATGTCCGCCGACGGCTACCACAACATTTCTACCAAGGATGGTGACTGCGG |      |       |
| FJ848675 YHV protease | (228)  | GTCACGTGCTGATGACATCAGGGTTGGTTCAATGTCCGCCGACGGCTACCACAACATTTCTACCAAGGATGGTGACTGCGG |      |       |
| YHV anti protease     | (1)    | -----                                                                             |      | ----- |
|                       |        | 1361                                                                              |      | 1440  |
| cpPstDNV Sinnuengnong | (990)  | -----                                                                             |      | ----- |
| cpPstDNV-dspro        | (1361) | TTCACCTCCTCTTTGACCACCTTCACAATGTTGTTGGAGCTCACATCGTCGGCATTGCTAGCATCCCTCCTGTTAACGGTG |      |       |
| FJ848675 YHV protease | (308)  | TTCACCTCCTCTTTGACCACCTTCACAATGTTGTTGGAGCTCACATCGTCGGCATTGCTAGCATCCCTCCTGTTAACGGTG |      |       |
| YHV anti protease     | (1)    | -----                                                                             |      | ----- |
|                       |        | 1441                                                                              |      | 1520  |
| cpPstDNV Sinnuengnong | (990)  | -----                                                                             |      | ----- |
| cpPstDNV-dspro        | (1441) | CCCTGACCTGGAATGCAGAAAAGGAAATGCTCTGCGGACCAAAATGATGACTACGATTACGATCCAGAAAAAGTCGGTCCA |      |       |
| FJ848675 YHV protease | (388)  | CCCTGACCTGGAATGCAGAAAAGGAAATGCTCTGCGGACCAAAATGATGACTACGATTACGATCCAGAAAAAGTCGGTCCA |      |       |
| YHV anti protease     | (1)    | -----                                                                             |      | ----- |
|                       |        | 1521                                                                              | loop | 1600  |
| cpPstDNV Sinnuengnong | (990)  | -----                                                                             |      | ----- |
| cpPstDNV-dspro        | (1521) | CCCAAGGTATGGCCTGTAGAATCAATCACTGCTCTCAGCACGATCCTCAATCAGCTCAAGTATGTCACCGGAGATGGCTT  |      |       |
| FJ848675 YHV protease | (468)  | CCCAAGGTATGGC-----                                                                |      |       |
| YHV anti protease     | (1)    | -----                                                                             |      | ----- |
|                       |        | 1601                                                                              | loop | 1680  |
| cpPstDNV Sinnuengnong | (990)  | -----                                                                             |      | ----- |
| cpPstDNV-dspro        | (1601) | CACCTACACCCAACTCCTTACAACTATCAGCTAATTGGTTGCGAGACACTGGACCAAGCTTGCATACCTTGGGTGGAC    |      |       |
| FJ848675 YHV protease | (480)  | -----                                                                             |      |       |
| YHV anti protease     | (1)    | -----GCCATACCTTGGGTGGAC                                                           |      |       |
|                       |        | 1681                                                                              |      | 1760  |
| cpPstDNV Sinnuengnong | (990)  | -----                                                                             |      | ----- |
| cpPstDNV-dspro        | (1681) | CGACTTTTCTGGATCGTAATCGTAGTCATCATTTGGTCCGCAGAGCATTTCCTTTTCTGCATTCCAGGTCAGGGCACCGT  |      |       |
| FJ848675 YHV protease | (480)  | -----                                                                             |      |       |
| YHV anti protease     | (18)   | CGACTTTTCTGGATCGTAATCGTAGTCATCATTTGGTCCGCAGAGCATTTCCTTTTCTGCATTCCAGGTCAGGGCACCGT  |      |       |
|                       |        | 1761                                                                              |      | 1840  |
| cpPstDNV Sinnuengnong | (990)  | -----                                                                             |      | ----- |
| cpPstDNV-dspro        | (1761) | TAACAGGAGGGATGCTAGCAATGCCGACGATGTGAGCTCCAACAACATTGTGAAGGTGGTCAAAGAGGAGTGAACCGCAG  |      |       |
| FJ848675 YHV protease | (480)  | -----                                                                             |      |       |
| YHV anti protease     | (98)   | TAACAGGAGGGATGCTAGCAATGCCGACGATGTGAGCTCCAACAACATTGTGAAGGTGGTCAAAGAGGAGTGAACCGCAG  |      |       |
|                       |        | 1841                                                                              |      | 1920  |
| cpPstDNV Sinnuengnong | (990)  | -----                                                                             |      | ----- |
| cpPstDNV-dspro        | (1841) | TCACCATCCTTGGTAGAAATGTTGTGGTAGCCGTCGGCGGACATTGAACCAACCTGATGTCATCAGCAGTGACGAAGTA   |      |       |
| FJ848675 YHV protease | (480)  | -----                                                                             |      |       |
| YHV anti protease     | (178)  | TCACCATCCTTGGTAGAAATGTTGTGGTAGCCGTCGGCGGACATTGAACCAACCTGATGTCATCAGCAGTGACGAAGTA   |      |       |
|                       |        | 1921                                                                              |      | 2000  |
| cpPstDNV Sinnuengnong | (990)  | -----                                                                             |      | ----- |
| cpPstDNV-dspro        | (1921) | TGCGTACTGAGTGCGTTGGAGTTTACCGAATTGAGTACAGTTGCTTCTGCGAATGGACTGTCGGTTTTGATGAAAGGAG   |      |       |
| FJ848675 YHV protease | (480)  | -----                                                                             |      |       |
| YHV anti protease     | (258)  | TGCGTACTGAGTGCGTTGGAGTTTACCGAATTGAGTACAGTTGCTTCTGCGAATGGACTGTCGGTTTTGATGAAAGGAG   |      |       |
|                       |        | 2001                                                                              |      | 2080  |
| cpPstDNV Sinnuengnong | (990)  | -----                                                                             |      | ----- |
| cpPstDNV-dspro        | (2001) | TGGCGTCATATTCTTCGCTCAACAATTCGATGTCATGAGTTTCTTCACCTTTTGTGACGCGGATGTGTCGTGTGAGAGTG  |      |       |
| FJ848675 YHV protease | (480)  | -----                                                                             |      |       |
| YHV anti protease     | (338)  | TGGCGTCATATTCTTCGCTCAACAATTCGATGTCATGAGTTTCTTCACCTTTTGTGACGCGGATGTGTCGTGTGAGAGTG  |      |       |
|                       |        | 2081                                                                              | XhoI |       |
| cpPstDNV Sinnuengnong | (990)  | -----                                                                             |      | 2140  |
| cpPstDNV-dspro        | (2081) | TTGTCAGTACAGGAGTCGAAGATGTGACGAGGAAAGTAGAGGAATTGCCGCTGATCGAG                       |      | 2140  |
| FJ848675 YHV protease | (480)  | -----                                                                             |      | 2140  |
| YHV anti protease     | (418)  | TTGTCAGTACAGGAGTCGAAGATGTGACGAGGAAAGTAGAGGAATTGCCGCTGATCGAG                       |      | 2140  |

**Figure S1.** Nucleotide sequence alignment of pET28a-Linked cpPstDNV-dspro with other relevant plasmid and gene.

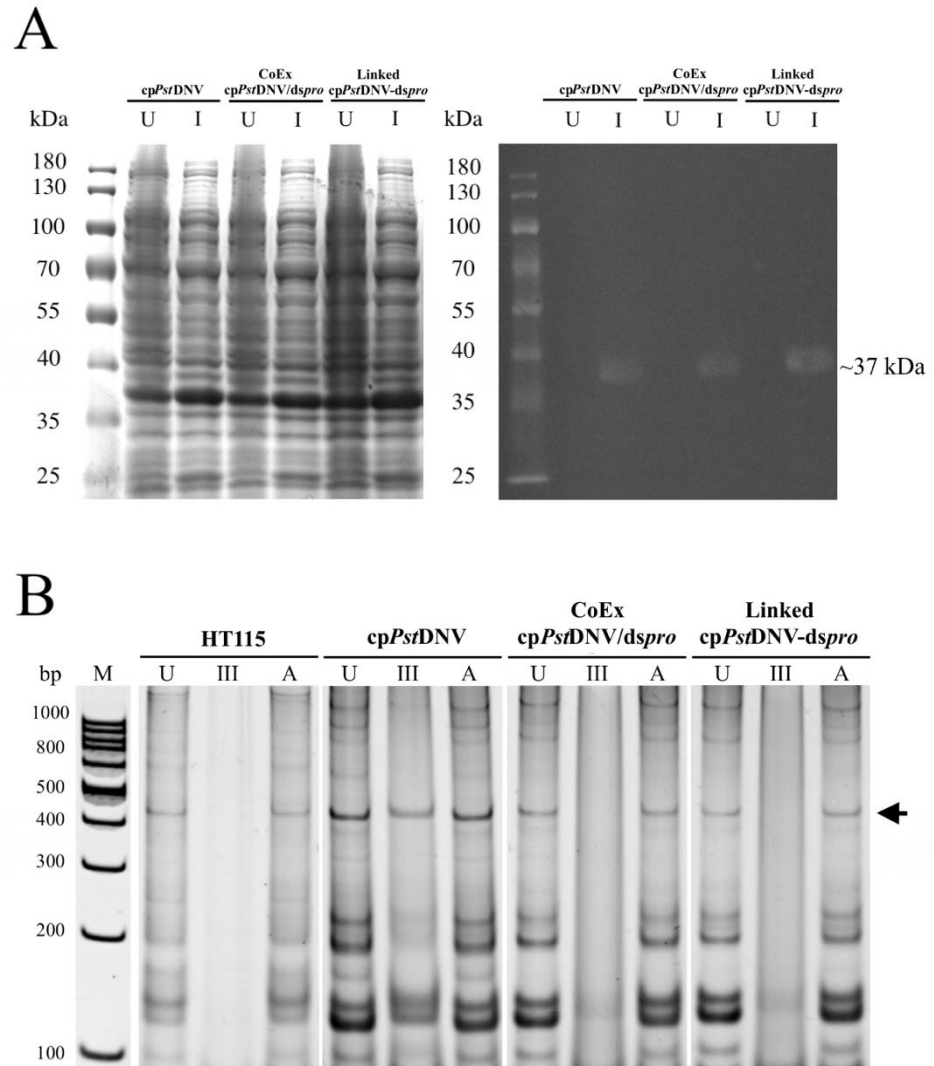

**Figure S2.** Expression of recombinant Linked *cpPstDNV-dspro*, *cpPstDNV* and CoEx *cpPstDNV/dspro* in *E. coli* strain Rosetta-gami 2(DE3) pLysS. (A) SDS-PAGE and western blot analysis from the total cell lysate of induced (lane I) and uninduced (U) recombinant bacteria. Lane M, PageRuler™ Prestained Protein Ladder (Thermo Fisher Scientific, Waltham, MA, USA) (B) The dsRNA-YHV *protease* gene expression and its properties were analyzed on 12% TAE buffered-polyacrylamide gel after total RNAs isolated from induced recombinant *E. coli* strain Rosetta-gami 2(DE3) pLysS and HT115 (lane U) were treated with RNase III (lane III) or RNase A (lane A). Lane M, GeneRuler 100 bp DNA Ladder (Thermo Fisher Scientific, Waltham, MA, USA). Arrow indicates *dspro*.

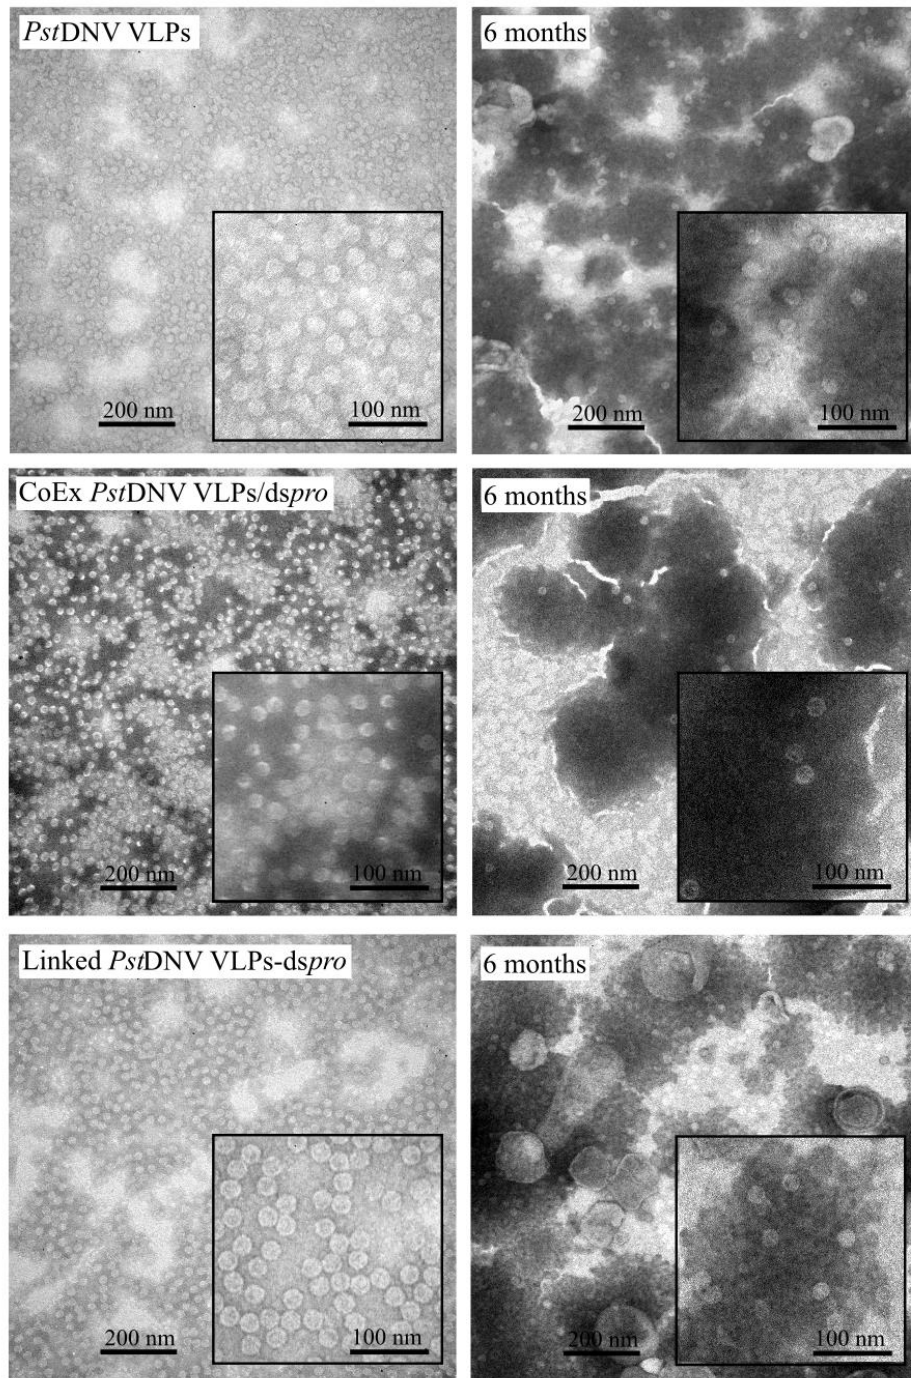

**Figure S3.** Transmission electron micrograph of *PstDNV* VLPs, CoEx *PstDNV* VLPs/*dspro* and Linked *PstDNV* VLPs-*dspro* and their stability after being kept at 4 °C for 6 months. Bars = 200 and 100 nm.

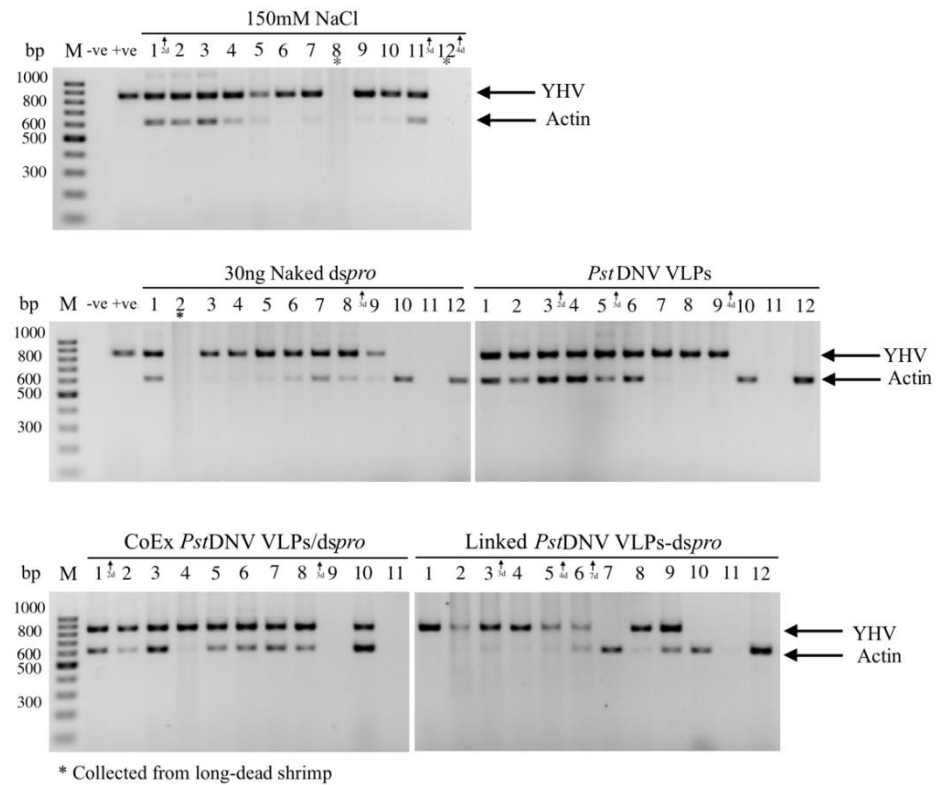

**Figure S4.** Confirmation of shrimp in all treatments infected with YHV. Agarose gel electrophoresis of RT-PCR products specific for YHV *helicase* from challenged shrimps. Host's *actin* gene was used as an internal control. Small arrows indicate the date on which each animal found dead following a virus challenge. Asterisk indicates sample collected from a long-dead shrimp. Lane M; GeneRuler 100 bp DNA Ladder (Thermo Fisher Scientific, Waltham, MA, USA), Lane +ve; positive control PCR, Lane -ve; negative control PCR.

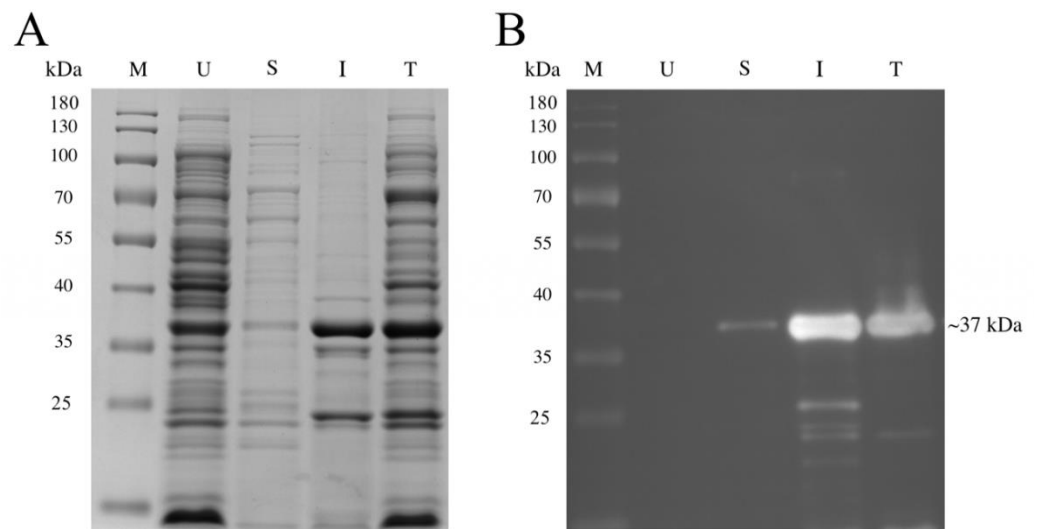

**Figure S5.** The solubility of recombinant Linked cpPstDNV-dspro in ENZhance lysis buffer. Induced bacteria (1 OD<sub>600nm</sub>) were resuspended in ENZhance lysis buffer and incubated on ice for 30 min. After the bacterial suspension was centrifuged at 17,000 xg at 4 °C for 15 min, supernatant was taken (lane S) and cell debris was washed twice with sterile water (lane I). Both samples were then analyzed by SDS-PAGE (A) and western blotting (B). Lane M, PageRuler™ Prestained Protein Ladder (Thermo Fisher Scientific, Waltham, MA, USA), Lane U; total cell lysate of uninduced cell, Lane T, total cell lysate of induced cell.
